# Supplementary material
Source: publisher figshare collection journal article supplement (https://karger.figshare.com/ndownloader/files/30700100)
Supplement: Supplementary file 1 [file 30700100]

Online Supplementary eFigure 6 – Time to perform ETT-Echo in the > 2000 g population. On X-axis ETT-Echos in chronological order of performance, on the Y-axis time to perform the exam in minutes. It is possible to see the reduction of needed time with increasing operators experience.
